# Supplementary material
Source: publisher site journal article supplement (https://www.dovepress.com/article/306571)
Supplement: Supplementary file 1 [file get_supplementary_file.php]

**Supplement 1: Full survey questionnaire**

**Consent sheet**

A questionnaire for the study of the assessment of knowledge, attitude, practice and associated factors of Wastewater management (LWM) among the residents in Gondar town, northwest Ethiopia, 2016.

Dear Sir/madam! My name is __________________________I am here on behalf of University of Gondar, College of Medicine and Health Sciences, Institute of Public Health. We are conducting research on the assessment of Knowledge, attitude, practice and associated factors of wastewater management. The major aim of this study is to assess the knowledge, attitude, practice and associated factors regarding wastewater management among the residents in Gondar town. The participation is not obligatory. The study participants are selected. You have the right to withdraw consent and discontinue participation at any time. You might be benefited or not, but in future may benefit and would not harmful. We assuring you to give accurate information ensure confidentiality and will not personally identify this research.

We are kindly requesting you to answer questions that we have prepared for you and those study questionnaires will take maximum of 20-30 minutes. We assure that all information gathered during the course of study will be kept strictly confidential and the information is used for this research only. All the information that you will be given to us will be coded for anonymity. Only the principal investigator and data collector will have access to the data.

Are you voluntary to participate in the interview? **1. Yes 2. No**

Thank you in advance for your participation!

Interview Date: _______________Interviewer’s Name: ____________________

**The English version questionnaires**

Questionnaire for the study of the assessment of knowledge, attitude, practice and associated factors of liquid waste management (LWM) among the residents in Gondar town, northwest Ethiopia, 2016.

| **Part I : Socio-Demographic Characteristics of the Respondent**  Dear participant, the following questions are targeted to differentiate your Socio-Demographic characteristics | | | | | |
| --- | --- | --- | --- | --- | --- |
| **No**. | **Questions** | **Response** | | | **Code** |
| 101 | Gender | 1. Male 2. Female | | |  |
| 102 | Age | /--------------/years | | |  |
| 103 | Religion | 1. Orthodox 2. Muslim  3.Protestant 4.Catholic 5.Other | | |  |
| 104 | Educational level | 1. Can’t read or write 2. Read only  3. Read and write 4. Primary (1-8) 5.Religious schooling only  6. Secondary (9-12) 7. Technical or vocational  8.Higher education (professional or post-graduate) | | |  |
| 105 | Household family size | Male /-------------------/ Female /------------------/ | | |  |
| 106 | Occupational status | 1. Civil servant 2. Self-employed 3. Unemployed | | 1. Student 2. Retired 3. Other |  |
| 107 | Average monthly income | /----------------------------/ in ETB | | |  |
| 108 | Housing tenure | 1. Owner 2. Tenant | | |  |
| 109 | Space availability for latrine/ septic tank construction | 1. Have space 2. Have no space | | |  |
| 110 | Marital status | 1. Single 2. Married | 1. Divorced 2. Widowed | |  |
| 111 | Does your town have a liquid waste management plan? | 1. Yes 2. No 3. I do not know | | |  |

| **Part II: Knowledge Questions**  Dear participants, the following questions are target to see your Knowledgetowardsliquid waste management and its importance. | | | |
| --- | --- | --- | --- |
| **No** | **Questions** | **Response** | **Code** |
| 201 | Describe liquid waste | 1. fluids such as wastewater,fats, oils or grease (FOG)  2. water from kitchen, dishwashing, bath  3. any water mixed litter of vegetable |  |
| 202 | Information about liquid waste management  * If the answer is **No** go to Questions No **204**. | 1. Yes 2. No |  |
| 203 | Source of your information  (Multiple response is allowed) | 1. Mass media 2. Kebele/ local meeting 3. Municipality 4. Health extension 5. workers 6. Others |  |
| 204 | Do you collect waste water at your home | 1. Yes 2.No |  |
| 205 | If yes, how often you collect per week | /……………………./ |  |
| 206 | If no ,why | ………………………………………. |  |
| 207 | Identify type of tool you use in your home. | 1.soak pit 2.septic tank  3.pour flush 4.pit latrine  5.ventileted pit latrine 6.Open ditch |  |
| 208 | Disease can be transmitted due to improper liquid waste management | 1. Yes 2. No |  |
| 209 | There might be cross contamination of drinking water from waste water sources. | 1. Yes 2. No |  |
| 210 | Domestic waste water can be treated and reused. | 1. Yes 2. No |  |
| 211 | Proper liquid waste management can improve health | 1. Yes 2. No |  |
| 212 | Liquid wastes do not cause any health problem | 1. Yes 2. No |  |
| 213 | Improperly managed liquid waste can serve as a breeding site for mosquito | 1. Yes 2. No |  |
| 214 | What major diseases transmitted due to improper liquid waste disposal? | 1. None 2. Skin diseases  3. Eye problems 4. Diarrhea  5. Typhoid 6. Scabies  7. Cholera 8. Intestinal parasites  9. Other (specify)**-----------------------**) |  |
| 215 | Has anyone in the family been ill with diarrhea in the last two weeks? | 1. Yes 2. No |  |
| 216 | If yes, how many? | 1. Male ____________  2. Female ___________ |  |
| 217 | The city municipality is the only body responsible for liquid waste management | 1. Yes 2. No |  |
| 218 | Liquid waste management is to be a major and basic subject for any household | 1. Yes 2. No |  |
| 219 | Does Waste water treatment plant exist in this town | 1. Yes 2. No |  |

| **Part III : Attitude Questions**  Dear Participant, the following questions are target to see your attitudes towards liquid waste management. | | | |
| --- | --- | --- | --- |
| **No** | **Questions** | **Response** | **Code** |
| 301 | Liquid waste management is important for any households | 1. Strongly disagree 2. Disagree 3. Neutral 4. Agree 5. Strongly agree |  |
| 302 | Liquid waste management training is helpful for communities behavioral change | 1. Strongly disagree 2. Disagree 3. Neutral 4. Agree 5. Strongly agree |  |
| 303 | Improper Liquid waste management may expose you to different diseases | 1.Strongly disagree  2.Disagree  3.Neutral  4.Agree  5.Strongly agree |  |
| 304 | Proper liquid waste management is important to improve health | 1.Strongly disagree  2.Disagree  3.Neutral  4.Agree  5.Strongly agree |  |
| 305 | I have a contribution for appropriate liquid waste management. | 1 .Strongly disagree  2.Disagree  3. Neutral  4. Agree  5.Strongly agree |  |
| 306 | The city municipality is responsible for liquid waste management. | 1.Strongly disagree  2.Disagree  3. Neutral  4.Agree  5.Strongly agree |  |
| 307 | Do you worry about liquid waste | 1.Strongly disagree  2.Disagree  3.Neutral  4.Agree  5.Strongly agree |  |
| 308 | Are you satisfied with your current liquid waste management | 1.Strongly disagree  2.Disagree  3. Neutral  4.Agree  5.Strongly agree |  |
| 309 | Are you satisfied with your neighborhood waste management | 1.Strongly disagree  2.Disagree  3.Agree  4.Strongly agree |  |
| 310 | Do you feel bad when someone discharge directly waste water to the environment | 1.Strongly disagree  2.Disagree  3. Neutral  4. Agree  5.Strongly agree |  |
| 311 | Do you worry about access to liquid waste management service? | 1. Strongly disagree 2. Disagree 3. Neutral 4. Agree 5. Strongly agree |  |
| 312 | How satisfied are you with liquid waste disposal using open ditch? | 1. Strongly disagree 2. Disagree 3. Neutral 4. Agree 5. Strongly agree |  |
| 313 | Are you satisfied with general cleanness of your living neighborhood? | 1. Strongly disagree 2. Disagree 3. Neutral 4. Agree 5. Strongly agree |  |
| 314 | Are you willing to pay for liquid waste collection and disposal service? | 1. Strongly disagree 2. Disagree 3. Neutral 4. Agree 5. Strongly agree |  |
| 315 | Do you think that waste has a value? | 1. Strongly disagree 2. Disagree 3. Neutral 4. Agree 5. Strongly agree |  |
| 316 | How important is spending money for liquid waste collection to your family’s health? | 1. Strongly disagree 2. Disagree 3. Neutral 4. Agree 5. Strongly agree |  |
| 317 | Do you believe that urban health extension professionals are important for your family’s health? | 1. Strongly disagree 2. Disagree 3. Neutral 4. Agree 5. Strongly agree |  |

| **Part IV: Practice Questions**  Dear participants, the following questions are target to see your practices towards liquid waste management at your home. | | | |
| --- | --- | --- | --- |
| **No** | **Questions** | **Response** | **Code** |
| 401 | Does the household own latrine? | 1. Ye 2. No |  |
| 402 | Is the latrine has together shower Facility | 1. Yes 2. No |  |
| 403 | How do you collect house hold waste water? | /……………………….  ……………………….  ………………………/ |  |
| 404 | Who is responsible for liquid waste storage and disposal in the household? | 1. Husband/partner 2. Wife  3. House maid 4. Under five  5. Children 6. Other (specify) ---------------- |  |
| 405 | Where do you dispose liquid waste other than human excreta?  **If 2-6, go to 404** | 1. Open ditch/open field 2. Latrine  3. Open ditch 4. Soak away pit  5. Sewer line 6. septic tank  7. Other (specify) __________________ |  |
| 406 | If you dispose your liquid waste in open field, why do you do so?  (**check the main reason**) | 1. There is no service  2. I do not like the service  3. No one is responsible  4. have no space  5. Other (specify) …………………….. |  |
| 407 | Do you participate in the sanitation campaign in your environment? | 1. Yes 2. No |  |
| 408 | If no, why don’t you participate? | 1. I don’t have time 2. I don’t like it  3. No one is responsible 4. Other (specify)------- |  |
| 409 | Do you dispose liquid and solid waste mixed together | 1. Yes 2. No |  |
| 410 | If yes, why? | ………………………….. |  |
| 411 | Do you separate liquid waste and solid wastes before disposal | 1. Yes 2. No |  |
| 412 | If yes, how? | ………………………….. |  |
| 413 | Do you use the domestic waste water for gardening | 1. Yes 2. No |  |
| 414 | What can you do to prevent diseases due to improper liquid waste disposal? | 1. dispose liquid waste properly  2. Utilize the liquid waste management tool properly  3. Prevent flies from breeding  4. Other (specify)**-----------------------** |  |
| 415 | Do you reuse/recycle liquid wastes in the house? | 1. Yes 2. No |  |
| 416 | If yes , how? | ……………………….. |  |

**Thank you!**
